# Supplementary material for: Impact of an Enhanced Transtheoretical Model Intervention (ETMI) Workshop on the Attitudes and Beliefs Regarding Low Back Pain of Primary Care Physicians in the Israeli Navy
Source: MDPI journal article supplement (doi:10.3390/ijerph20064854), 2023-03-09
Supplement: s1 [file s1]

**Table S1.** Primary care physicians self-reported clinical behavior for treating chronic LBP  
(combined cohort).

|                                       | N (%)                                      | Never     | Rarely    | Sometimes | Often     | Always   |
|---------------------------------------|--------------------------------------------|-----------|-----------|-----------|-----------|----------|
| Provide<br>Medication<br>Prescription | Anti-Inflammatory                          | 1 (3.1)   | 2 (6.3)   | 12 (37.5) | 15 (46.9) | 2 (6.3)  |
|                                       | Opiates                                    | 12 (37.5) | 15 (46.9) | 5 (15.6)  |           |          |
|                                       | Over The Counter<br>Pain Medication        |           |           | 9 (28.1)  | 19 (59.4) | 4 (12.5) |
|                                       | Anti-Depressants                           | 14 (43.8) | 13 (40.6) | 5 (15.6)  |           |          |
|                                       | Benzodiazepine                             |           |           |           |           |          |
|                                       | Anti-Epileptic<br>(gabapentine,<br>lyrica) | 16 (50)   | 11 (34.4) | 5 (15.6)  |           |          |
|                                       | Cannabis referral                          | 29 (90.6) | 2 (6.3)   | 1 (3.1)   |           |          |
| Send for<br>Tests                     | X-Ray                                      | 5 (15.6)  | 15 (46.9) | 12 (37.5) |           |          |
|                                       | CT                                         | 3 (9.4)   | 22 (68.8) | 7 (21.9)  |           |          |
|                                       | MRI                                        | 23 (71.9) | 7 (21.9)  | 2 (6.3)   |           |          |
|                                       | Bone Scan                                  | 20 (62.5) | 9 (28.1)  | 3 (9.4)   |           |          |
|                                       | EMG                                        | 19 (59.4) | 11 (34.4) | 2 (6.3)   |           |          |
|                                       | Physiotherapy                              | 2 (6.3)   | 1 (3.1)   | 14 (43.8) | 13 (40.6) | 2 (6.3)  |

|                           |                                  |           |           |           |                     |
|---------------------------|----------------------------------|-----------|-----------|-----------|---------------------|
| Refer for Treatment       | Alternative Treatment            | 9 (28.1)  | 4 (12.5)  | 17 (53.1) | 2 (6.3)             |
|                           | Emergency Department             | 7 (21.9)  | 23 (71.9) | 2 (6.3)   |                     |
|                           | Pain Clinic                      | 17 (53.1) | 11 (34.1) | 4 (12.5)  |                     |
| Examination and Treatment | Manual Examination               |           |           | 5 (15.6)  | 27 (84.4)           |
|                           | Dry Needling                     | 26 (81.3) | 2 (6.3)   | 1 (3.1)   | 3 (9.4)             |
|                           | Reassure the Patient             | 2 (6.3)   | 4 (12.5)  | 8 (25)    | 14 (43.8) 4 (12.5)  |
|                           | Physical Activity Recommendation | 1 (3.1)   | 3 (9.4)   | 5 (15.6)  | 12 (37.5) 11 (34.4) |
